# Supplementary material for: An In Situ Prepared Comb-like Polycaprolactone-Based Gel Electrolyte for High-Performance Lithium Metal Batteries
Source: MDPI journal article supplement (doi:10.3390/ma16052117), 2023-03-06
Supplement: s1 [file s1]

## **An In Situ Prepared Comb-Like Polycaprolactone-based Gel Electrolyte for High-Performance Lithium Metal Batteries**

Yange Fan <sup>1,2,\*</sup>, Huifeng Wang <sup>1</sup>, Shipeng Chen <sup>1</sup>, Yimin Hou <sup>1</sup> and Shujiang Wang <sup>1</sup>

<sup>1</sup> Institute of Chemistry Co. Ltd., Henan Academy of Sciences, Zhengzhou 450002, China

<sup>2</sup> School of Materials Science and Engineering, Zhengzhou University, Zhengzhou 45001, China

\* Correspondence: fanyange@gs.zzu.edu.cn

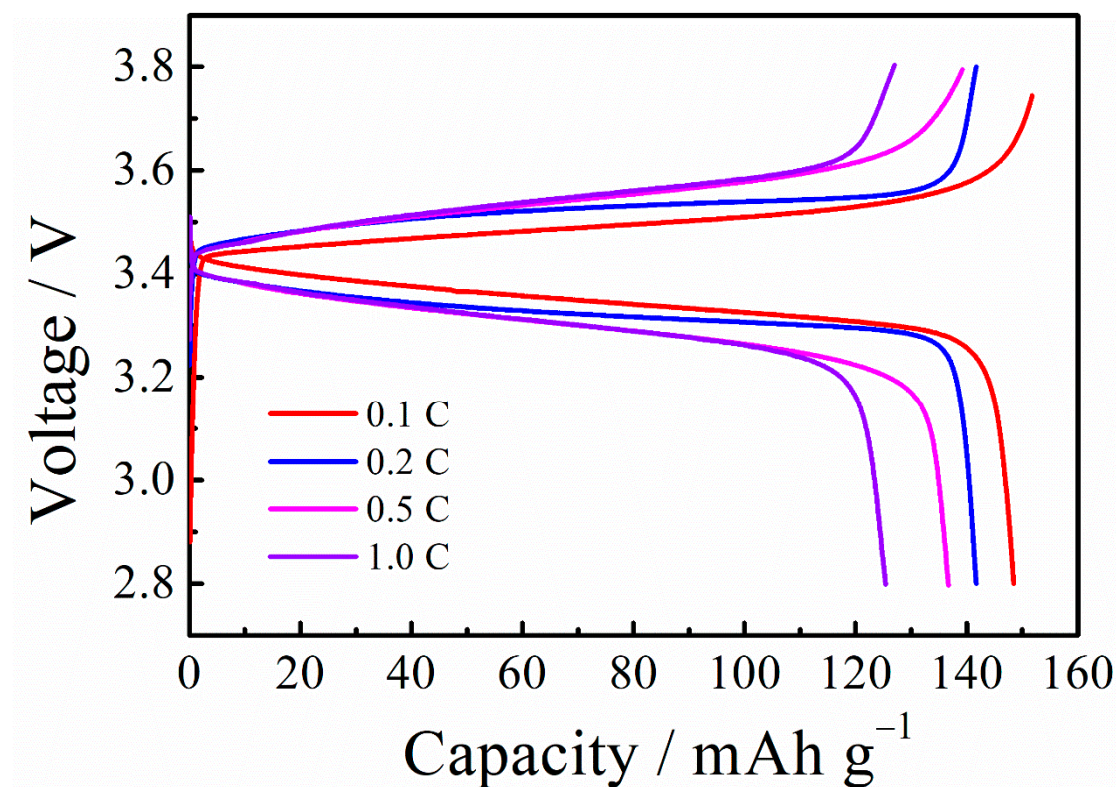

**Figure S1.** The charge/discharge profiles of the solid-state battery at various C-rates.

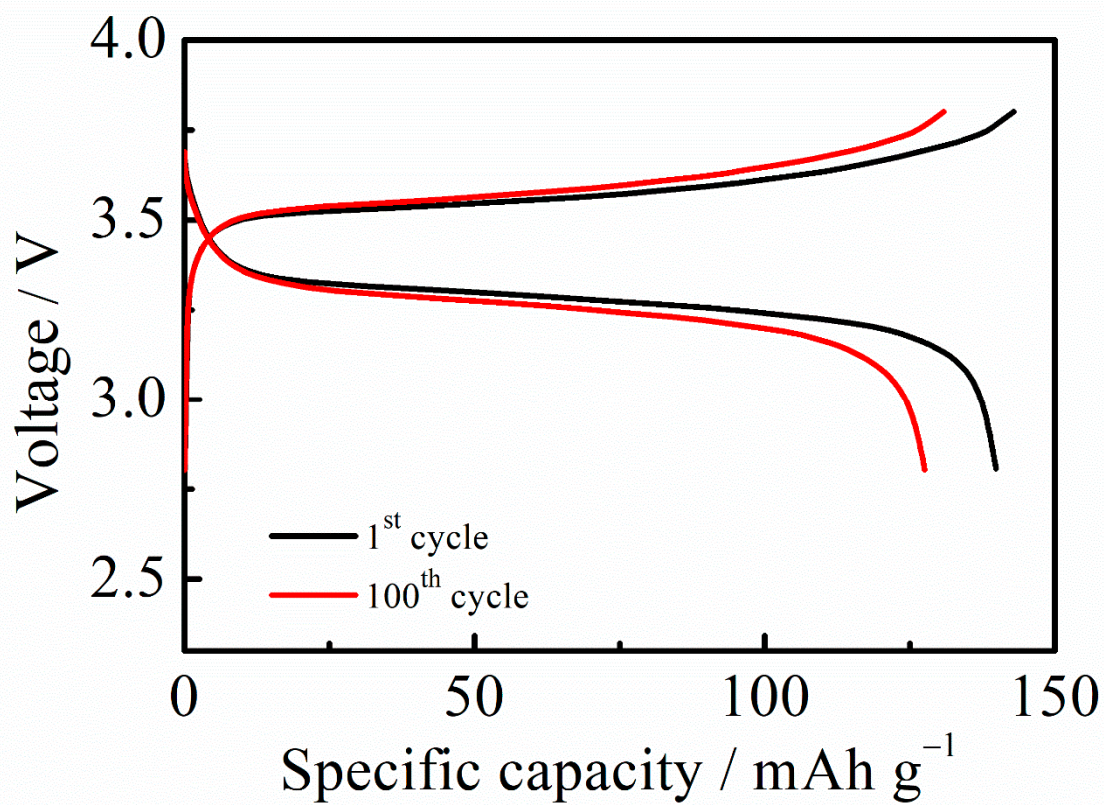

**Figure S2.** The charge/discharge profiles of the solid-state battery at 0.5C at 1<sup>st</sup> and 100<sup>th</sup> cycles.
